# Supplementary material for: Highly dispersed γ-Fe2O3 embedded in nitrogen doped carbon for the efficient oxygen reduction reaction
Source: Royal Society of Chemistry journal article supplement (doi:10.1039/c9cy01188a), 2019-01-01
Supplement: c9cy01188a1.pdf [file c9cy01188a1.pdf]

## **Highly Dispersed $\gamma$ -Fe<sub>2</sub>O<sub>3</sub> Embedded in Nitrogen Doped Carbon for Efficient Oxygen Reduction Reaction**

Zhourong Xiao<sup>a</sup>, Guoqiang Sheng<sup>a</sup>, Fang Hou<sup>a</sup>, Rongrong Zhang<sup>a</sup>, Yueting Li<sup>a</sup>, Gang  
Yuan<sup>a</sup>, Lun Pan<sup>a,b</sup>, JiJun Zou<sup>a,b</sup>, Li Wang<sup>a,b</sup>, Xiangwen Zhang<sup>a,b</sup>, Guozhu Li<sup>a,b\*</sup>

<sup>a</sup> Key Laboratory for Green Chemical Technology of Ministry of Education, School of  
Chemical Engineering and Technology, Tianjin University, Tianjin 300072, China

<sup>b</sup> Collaborative Innovation Center of Chemical Science and Engineering (Tianjin), Tianjin  
300072, China

\*Corresponding author. Tel. /fax: +86 22 27892340.

E-mail address:

## 1. Experiment

### 1.1 Catalyst preparation

The catalyst fabrication procedure is described in Scheme 1. 1.20 g of  $\text{FeCl}_3 \cdot 6\text{H}_2\text{O}$ , 1.00 g of glycine and 2 g of MgO nanoparticles (50 nm, Nanjing XianFeng Nano) were mixed in 5 mL water and sonicated for 15 min, followed by vigorously stirred for 6 h. Then the mixture was dried at 70 °C for 24 h, and then grinded and transferred to a quartz boat in the oven. The sample was fluxed with  $\text{N}_2$  (50 ml/min) at different carbonization temperature (600 °C, 700 °C, 800 °C, 900 °C) for 2 h. The obtained black solid was added in 50 ml  $\text{HNO}_3$  solution (1 mol/L) and stirred at room temperature for 30 min. The above leaching procedure was repeated for 2 times to completely remove the MgO template. The recovered black solid was washed with ethanol and water until the filtrate became neutral, and then the sample was dried at 60 °C for 24 h. The resultant sample is labeled as  $\text{Fe}_2\text{O}_3@ \text{NC-T}$  (T = carbonization temperature). For comparison, sample without the addition of  $\text{FeCl}_3 \cdot 6\text{H}_2\text{O}$  was synthesized at carbonization temperature of 800 °C by similar procedure and named as NC. Moreover, a series of catalysts with the addition of different amounts of  $\text{FeCl}_3 \cdot 6\text{H}_2\text{O}$  (0.2 g, 0.4 g, 0.8 g, 1.6 g) were also prepared at the carbonization temperature of 800 °C and named as  $\text{Fe}_2\text{O}_3@ \text{NC-x}$  (x = 0.2, 0.4, 0.8, 1.6). The pure  $\gamma\text{-Fe}_2\text{O}_3$  was purchased from Sigma.

### 1.2. Characterization

Surface area and pore structure of the catalysts were characterized by  $\text{N}_2$  adsorption-desorption at -196 °C using a Micromeritics Tristar 3000 analyzer. Pore distribution and the cumulative volume of pores were obtained by the Barret-Joyner-Halenda (BJH) method from the desorption branches of the  $\text{N}_2$  isotherms. XRD was performed on a Rigaku D8-Focus diffractometer employing the graphite filtered  $\text{Cu K}\alpha$  radiation

( $\lambda = 1.54056 \text{ \AA}$ ). Scanning electron microscopy (SEM) used in this paper is a FEI Nanosem 430. Raman spectra of the as-prepared catalysts were measured on a DXR Microscope system. 50 mg of the sample was excited using an argon laser operating at 532 nm for the Raman test. For the Raman shift from  $200 \text{ cm}^{-1}$  to  $800 \text{ cm}^{-1}$ , argon laser operating at 633 nm was adopted. Transmission electron microscopy (TEM) and high-resolution TEM (HR-TEM) images were collected using a Tecnai G2 F-20 microscope. The TEM samples were prepared by dropping and drying the solution of sample on holey carbon coated Cu grids. Electron energy loss spectroscopy (EELS) mapping analysis was carried out on Titan G2 60-300 Probe Cs Corrector UHRSTEM. X-ray absorption fine structure spectroscopy (XAFS) was performed at the 1W2B beamline, Beijing Synchrotron Radiation Facility. During the experiments, the storage ring with 2.5 GeV electrons at 250 mA constantly was used. X-ray photoelectron spectra (XPS) were recorded on an ESCALAB 250Xi spectrometer (Thermo Fisher Scientific) with an Al  $K\alpha$  ( $h\nu = 1486.6 \text{ eV}$ ) X-ray source.  $^{57}\text{Fe}$ -Mössbauer spectra were recorded at room temperature by means of a conventional constant-acceleration spectrometer with  $\gamma$ -ray source of  $\text{mCi}^{57}\text{Co}$  in a palladium matrix.

### *1.3. Electrode preparation and electrochemical measurements*

#### *1.3.1. Working electrode preparation*

A mirror-like surface of the glassy carbon electrode (GCE, 5 mm in diameter, geometric area =  $0.196 \text{ cm}^2$ ) was obtained by polishing with  $1 \text{ }\mu\text{m}$ ,  $0.5 \text{ }\mu\text{m}$  and  $0.05 \text{ }\mu\text{m}$  alumina powder slurry, respectively, and then ultrasonicated several times in ethanol and deionized water. A mixture containing of the as-prepared catalyst (3 mg), 1 ml water-isopropyl alcohol solution was firstly prepared. The obtained solution was ultrasonicated for 30 min. Then,  $25 \text{ }\mu\text{L}$  Nafion solution was added to the mixture followed by ultrasonication for at least 2 h. Finally,  $15 \text{ }\mu\text{L}$  of the homogeneous ink

was coated on the surface of GCE, which was dried under room temperature for 4 h to form a catalyst film. 0.229 mg cm<sup>-2</sup> of the catalyst was loaded on GCE. Similar process was adopted to load 20 wt% Pt/C on GCE with a loading amount of 0.229 mg cm<sup>-2</sup>.

### 1.3.2. Electrochemical measurement

CompactStat.h10800 potentiostat/galvanostat/electrochemical analyser (Ivium Technologies Co., Netherland), combining with a rotation speed controller (Pine Instrument Co., USA), was employed to perform the electrochemical measurement. A three-electrode system was set up and used for electrochemical data collection. RHE was used as the reference electrode, a graphite rod was selected as the counter electrode, and the catalyst-coated GCE was served as the working electrode, respectively.

Cyclic voltammetry (CV) curves were collected in O<sub>2</sub>-saturated or Ar-saturated KOH solution (0.1 M) at a scan rate of 50 mV s<sup>-1</sup> from 0.164 V to 1.164 V (vs RHE, the potential is relative to RHE unless specifically illustrated hereinafter). The polarization plots for ORR (linear sweep voltammetry, LSV) were obtained using the rotating disk electrode (RDE) technique in O<sub>2</sub>-saturated KOH solution (0.1 M). Commercial Pt/C (20 wt%) was obtained from HeSen Electric Co., and used as the benchmark.

The number of electrons transferred per O<sub>2</sub> molecule (n) in ORR was calculated using Koutecky-Levich (K-L) equation listed below.

$$\frac{1}{J} = \frac{1}{J_L} + \frac{1}{J_K} = \frac{1}{B\omega^{1/2}} + \frac{1}{nFkC_0}$$

$$B = 0.2nFC_0D_0^{2/3}\nu^{1/6}$$

Where J<sub>L</sub> is the limiting diffusion current density (mA cm<sup>-2</sup>), J is the measured

current density ( $\text{mA cm}^{-2}$ ),  $F$  is the Faraday constant ( $96485 \text{ C mol}^{-1}$ ),  $\omega$  is the rotating speed (rpm),  $C_0$  is the bulk concentration of  $\text{O}_2$  ( $1.2 \times 10^{-6} \text{ mol cm}^{-3}$ ),  $\nu$  is the kinetic viscosity of the electrolyte ( $0.01 \text{ cm}^2 \text{ s}^{-1}$ ),  $k$  is the electron-transfer rate constant, and  $D_0$  is the  $\text{O}_2$  diffusion coefficient ( $1.9 \times 10^{-5} \text{ cm}^2 \text{ s}^{-1}$ ).

The electron transfer number ( $n$ ) was verified based on ring current ( $I_{\text{ring}}$ ) and disk current ( $I_{\text{disk}}$ ) by RRDE measurement at 1600 rpm. Where  $N$ , representing the collection efficiency of Pt ring, equals to 0.37.

$$n = 4 \times \frac{I_{\text{disk}}}{(I_{\text{disk}} + I_{\text{ring}}/N)}$$

### *1.3.3. Zinc-air battery measurement*

To further investigation the real application of the as synthesized catalyst, the primary zinc-air battery was constructed using a polished zinc plate as the anode. The catalyst prepared by our or 20 wt% Pt/C catalyst electrode as the air cathode. The air cathode was prepared by spraying the catalyst onto carbon paper, and then dried at room temperature for 4 h. These two electrodes and 6 M KOH aqueous electrolyte were assembled into a home-made zinc-air battery. The catalyst mass loading was  $0.667 \text{ mg cm}^{-2}$ .

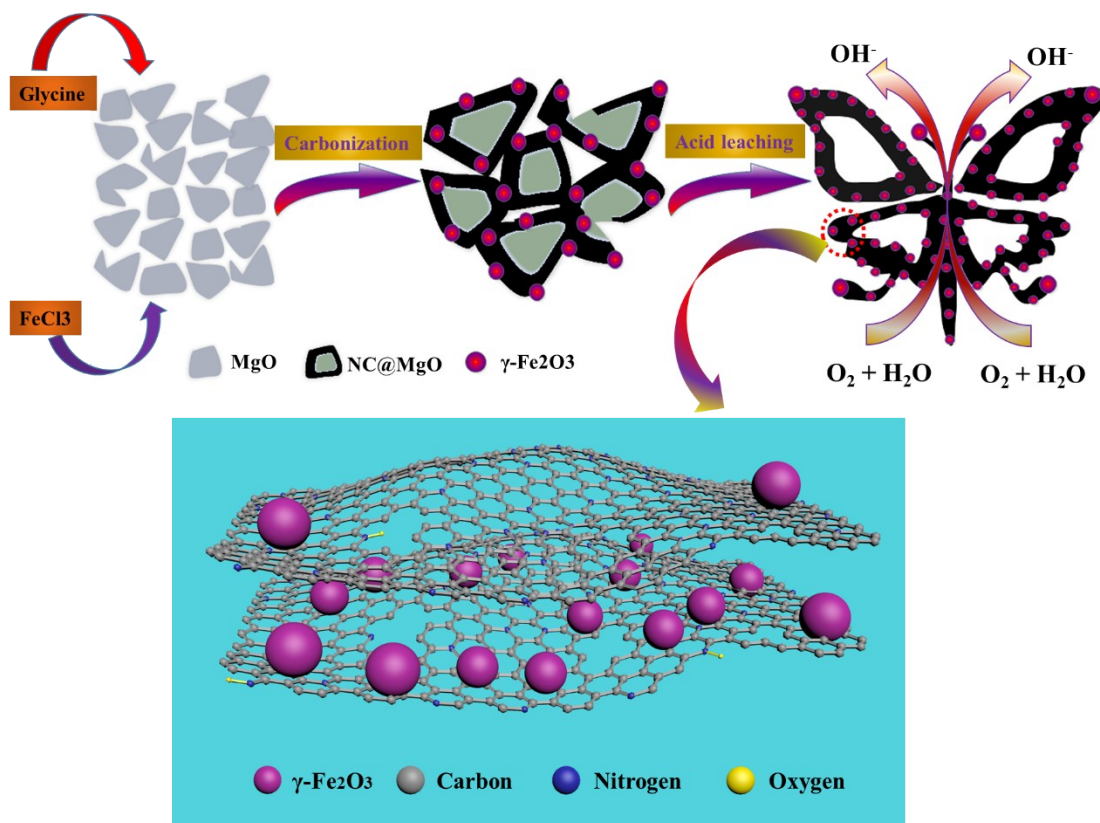

Scheme 1. Illustration of catalyst preparation.

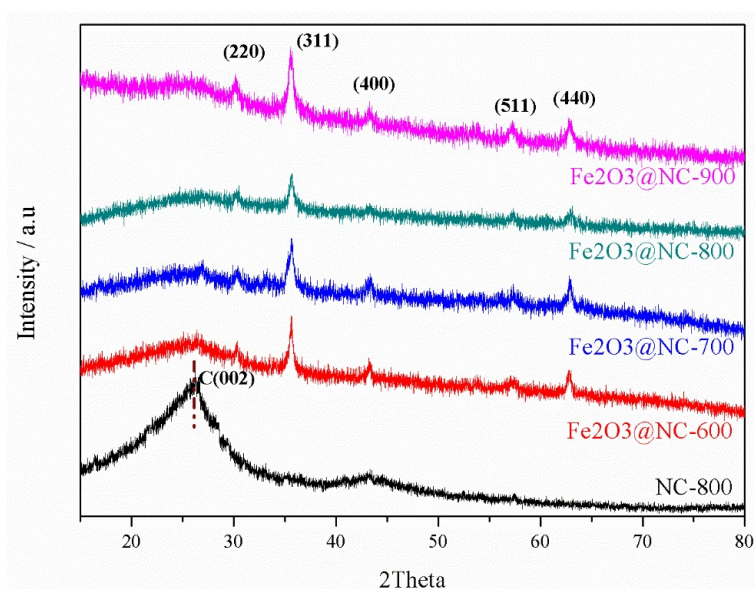

Fig. S1 XRD patterns of the as-prepared catalysts.

**Table S1** - Mössbauer parameters of Fe<sub>2</sub>O<sub>3</sub>@NC-800 derived from the fittings. Isomer shift (IS), line width (LW) and relative spectral area % of each component.

| Type         | $\delta_{\text{iso}}/\text{mm s}^{-1}$ | LW/mm s-1 | Area (%) |
|--------------|----------------------------------------|-----------|----------|
| Sextet peaks | 0.39                                   | 1.61      | 39.3     |
| Doublet 1    | 0.36                                   | 0.68      | 31.5     |
| Doublet 2    | 0.55                                   | 1.01      | 29.2     |

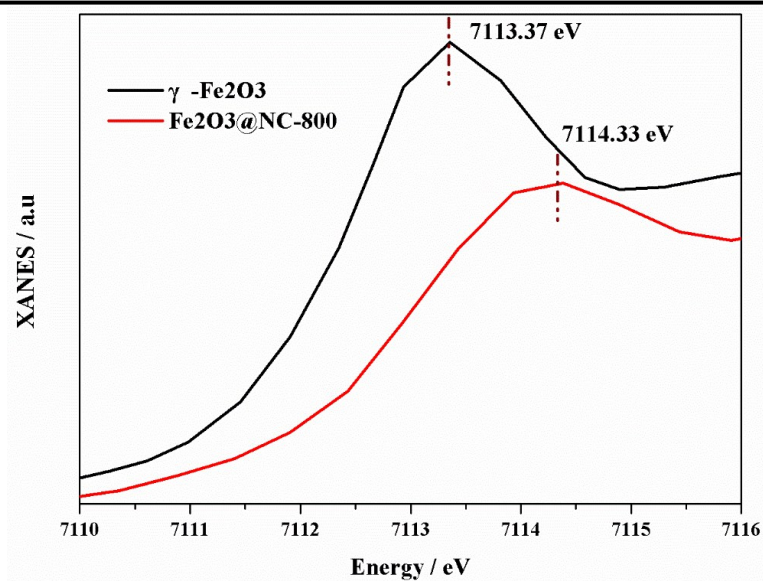

**Fig. S2** Fe K-edge XANES spectra.

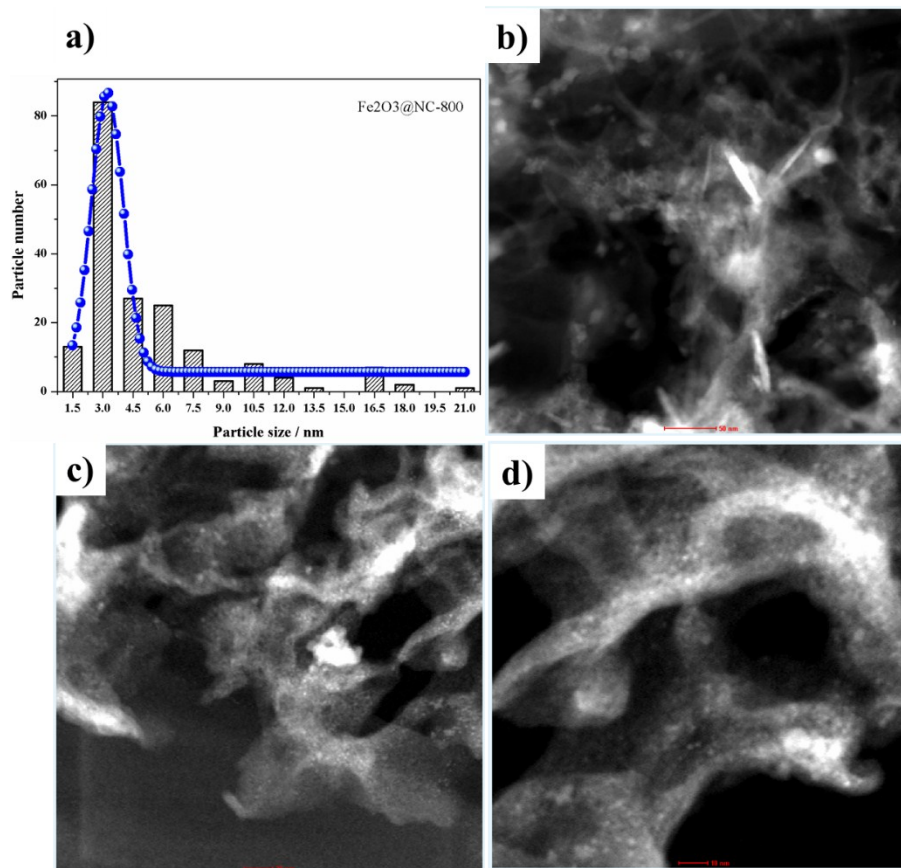

**Fig. S3** (a) Particle size distribution of  $\gamma$ -Fe<sub>2</sub>O<sub>3</sub> for Fe<sub>2</sub>O<sub>3</sub>@NC-800, (b-d) corresponding TEM images for the count of particles size.



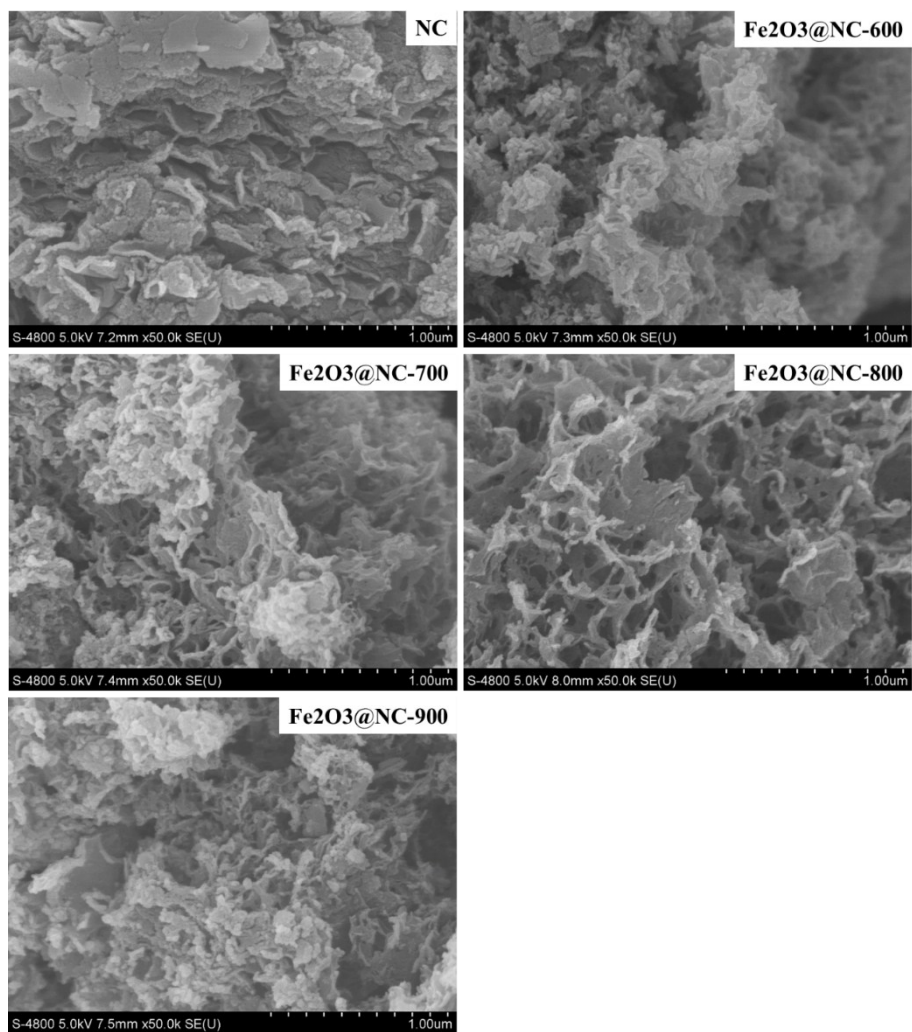

**Fig. S4** SEM images of as-prepared samples.

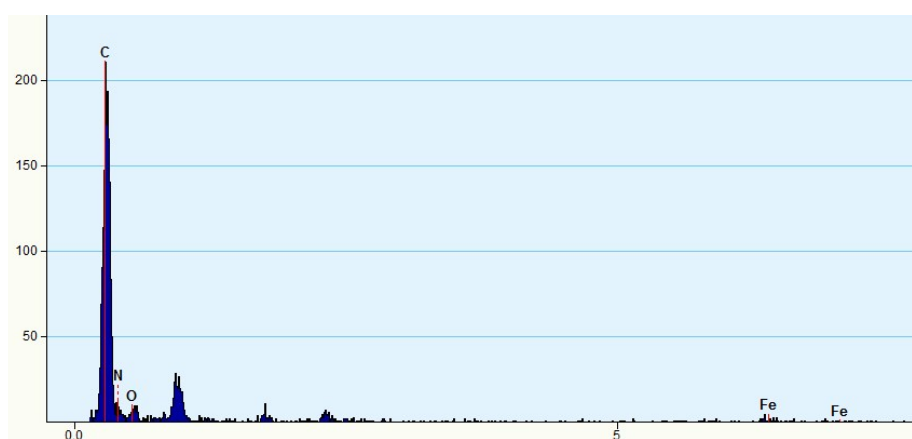

**Fig. S5** EDX analysis of Fe<sub>2</sub>O<sub>3</sub>@NC-800.

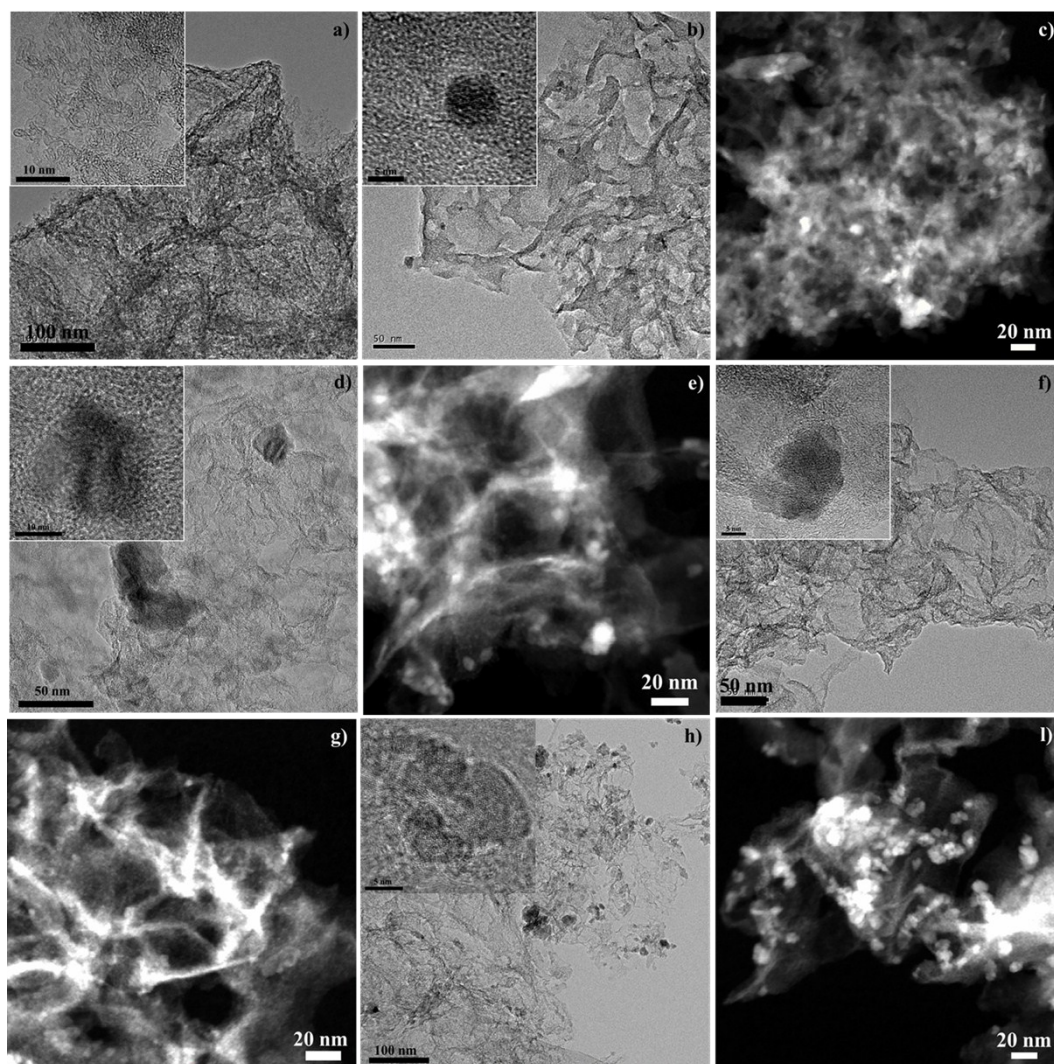

**Fig. S6** TEM images of as-prepared samples. (a) NC, (b-c)  $\text{Fe}_2\text{O}_3@\text{NC}-600$ , (d-e)  $\text{Fe}_2\text{O}_3@\text{NC}-700$ , (f-g)  $\text{Fe}_2\text{O}_3@\text{NC}-800$ , (h-i)  $\text{Fe}_2\text{O}_3@\text{NC}-900$ .

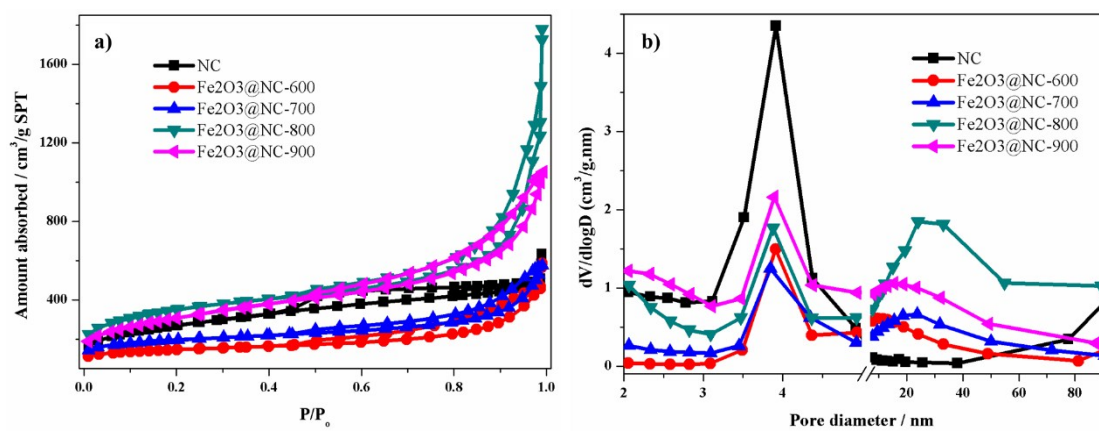

**Fig. S7** (a) Nitrogen adsorption-desorption isotherm and (b) pore size distribution of as-prepared samples.

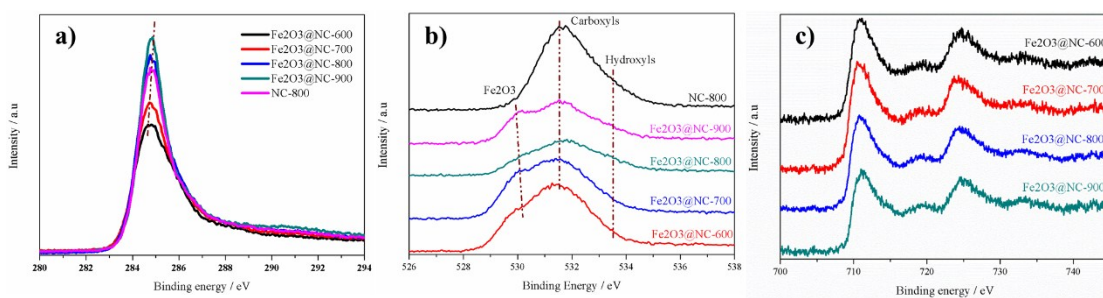

**Fig. S8** XPS spectra of as-prepared samples, (a) C 1s, (b) O 1s, (c) Fe 2p.

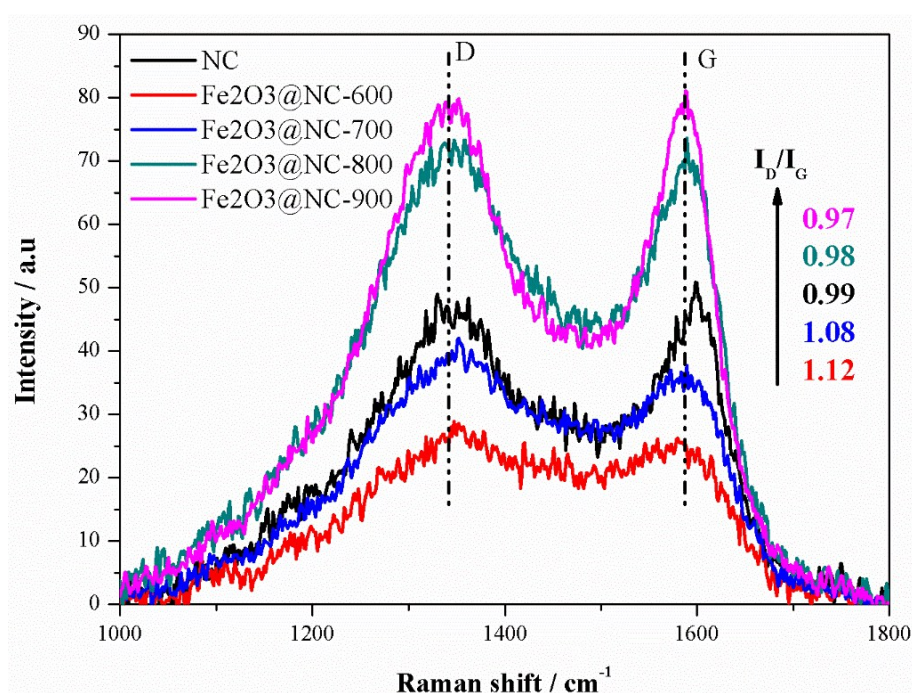

**Fig. S9** Raman spectra of as-prepared sample.

**Table S2** - Surface compositions of the as-prepared catalysts.

| Element | NC   | Fe <sub>2</sub> O <sub>3</sub> @NC-600 | Fe <sub>2</sub> O <sub>3</sub> @NC-700 | Fe <sub>2</sub> O <sub>3</sub> @NC-800 | Fe <sub>2</sub> O <sub>3</sub> @NC-900 |
|---------|------|----------------------------------------|----------------------------------------|----------------------------------------|----------------------------------------|
| C 1s    | 76.1 | 64.91                                  | 68.95                                  | 77.20                                  | 81.85                                  |
| N 1s    | 5.89 | 14.35                                  | 11.38                                  | 5.69                                   | 3.61                                   |
| O 1s    | 17.7 | 17.23                                  | 16.16                                  | 13.87                                  | 11.58                                  |
| Fe 2p   | 0.28 | 3.51                                   | 3.51                                   | 3.24                                   | 2.97                                   |

**Table S3** - The ratio of different type of N element.

| Element     | NC    | Fe <sub>2</sub> O <sub>3</sub> @ |
|-------------|-------|----------------------------------|----------------------------------|----------------------------------|----------------------------------|
|             |       | NC-600                           | NC-700                           | NC-800                           | NC-900                           |
| Pyridinic N | 26.58 | 42.31                            | 34.47                            | 21.52                            | 14.26                            |
| Pyrrolic N  | 10.31 | 17.13                            | 17.45                            | 16.65                            | 18.22                            |
| Graphitic N | 45.69 | 28.82                            | 37.66                            | 50.16                            | 50.04                            |
| Oxidized N  | 17.42 | 11.74                            | 10.41                            | 11.68                            | 17.49                            |

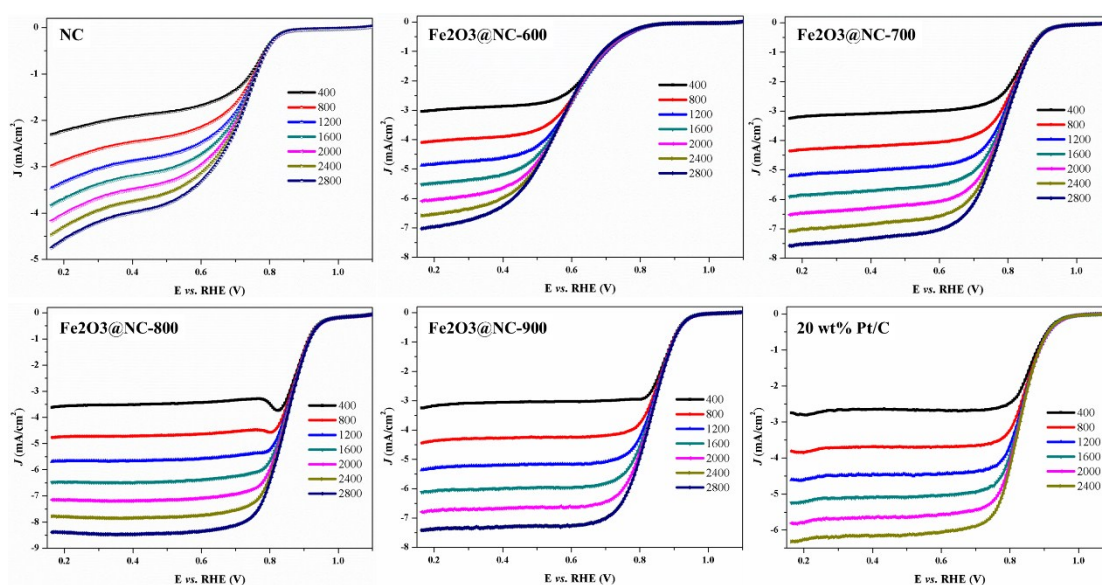

**Fig. S10** Linear sweep voltammograms recorded in O<sub>2</sub>-saturated 0.1 M KOH at a scan rate of 10 mV s<sup>-1</sup>.

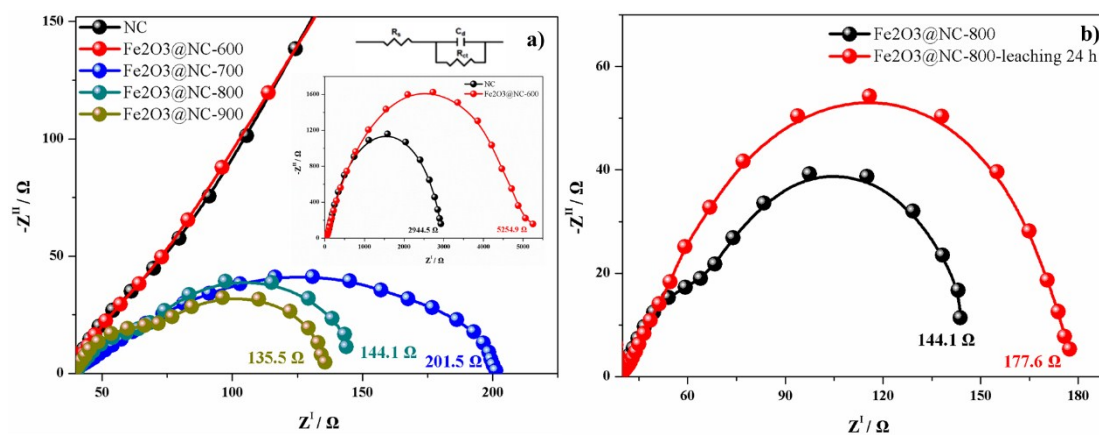

**Fig. S11** Electrochemical impedance spectra.

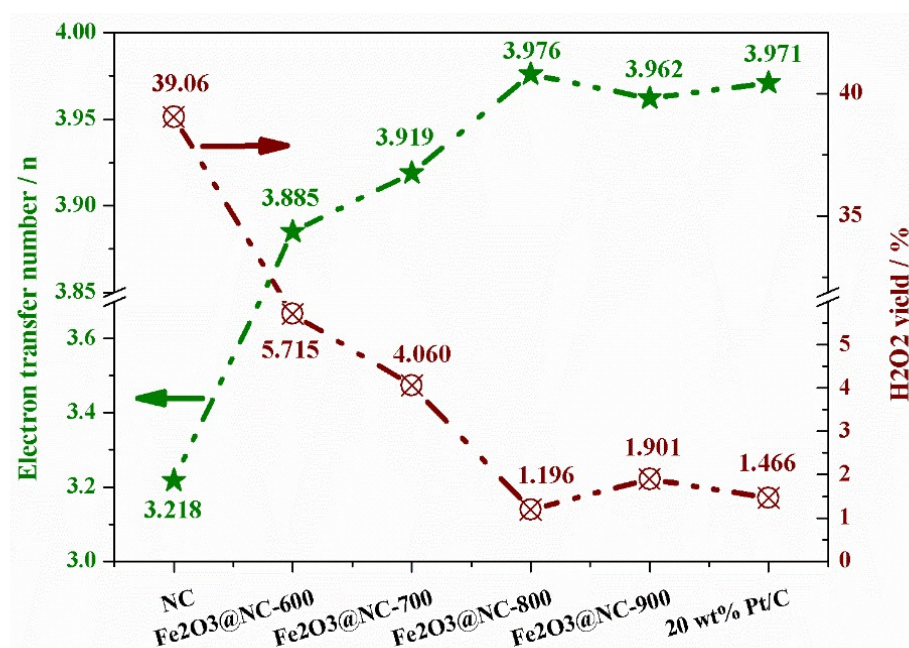

Fig. S12 Electron transfer numbers and H<sub>2</sub>O<sub>2</sub> yields (0.464 V. RHE) on various catalysts.

**Table S4** - Comparison of ORR performance between Fe<sub>2</sub>O<sub>3</sub>@NC-800 and those reported previously in other's works.

| Catalysts                                                                     | Loading<br>(mg cm <sup>-2</sup> ) | $\Delta E_{1/2}$ (RHE,<br>mV) <sup>a</sup> | $J_L$ (mA cm <sup>-2</sup> )<br>(RHE) | Refs. |
|-------------------------------------------------------------------------------|-----------------------------------|--------------------------------------------|---------------------------------------|-------|
| $\alpha$ -Fe <sub>2</sub> O <sub>3</sub> /CNTs                                | 0.204                             | -120                                       | 1.31 (0.364 V)                        | 1     |
| OMCs-Fe <sub>2</sub> O <sub>3</sub>                                           | 0.500                             | -30                                        | 3.91 (0.364 V)                        | 2     |
| ND-Fe <sub>3</sub> O <sub>4</sub>                                             | 0.100                             | -111                                       | 5.25 (0.504 V)                        | 3     |
| Fe-Fe <sub>2</sub> O <sub>3</sub> /RGO                                        | 0.255                             | -45                                        | 6.31 (0.454 V)                        | 4     |
| Fe-Fe <sub>2</sub> O <sub>3</sub> @NC                                         | 0.240                             | -50                                        | 4.00 (0.244 V)                        | 5     |
| Fe-N-C/CNTs-800                                                               | 0.229                             | -130                                       | 4.50 (0.364 V)                        | 6     |
| Fe-PDA-C                                                                      | 0.500                             | -120                                       | 2.30 (0.464 V)                        | 7     |
| $\alpha$ -Fe <sub>2</sub> O <sub>3</sub> / Fe <sub>3</sub> O <sub>4</sub> /NC | 0.120                             | 7                                          | 6.02 (0.464 V)                        | 8     |
| Fe/NMC-11                                                                     | 0.510                             | 7                                          | 6.12 (0.464 V)                        | 9     |
| Fe@C-FeNCs-2                                                                  | 0.626                             | 5                                          | 5.35 (0.464 V)                        | 10    |
| Fe <sub>3</sub> N-OMC                                                         | 0.080                             | 12                                         | 4.13 (0.464 V)                        | 11    |

|                                         |       |     |                |           |
|-----------------------------------------|-------|-----|----------------|-----------|
| Fe/Fe <sub>3</sub> C@N-rGO              | 0.150 | 0   | 5.15 (0.464 V) | 12        |
| Fe-ANCS-3                               | 0.495 | 6   | 6.00 (0.464 V) | 13        |
| MZ8-S-P                                 | 0.400 | 28  | 5.35 (0.464 V) | 14        |
| FeN <sub>2</sub> /NOMC-3                | 0.500 | 33  | 4.98 (0.464 V) | 15        |
| Fe <sub>3</sub> O <sub>4</sub> /N-C-900 | 0.150 | -21 | 5.12 (0.364 V) | 16        |
| Fe <sub>3</sub> O <sub>4</sub> /N-MCS-2 | 0.318 | 24  | 5.51 (0.464 V) | 17        |
| Fe-N/MCN                                | 0.196 | 30  | 5.20 (0.464 V) | 18        |
| Fe <sub>2</sub> O <sub>3</sub> @NC-800  | 0.229 | 28  | 6.49 (0.464 V) | This work |

a:  $\Delta E_{1/2} = E_{1/2}(\text{Fe}_2\text{O}_3@\text{NC-800}) - E_{1/2}(\text{20 wt\% Pt/C})$ . The electrolyte is 0.1 M KOH.

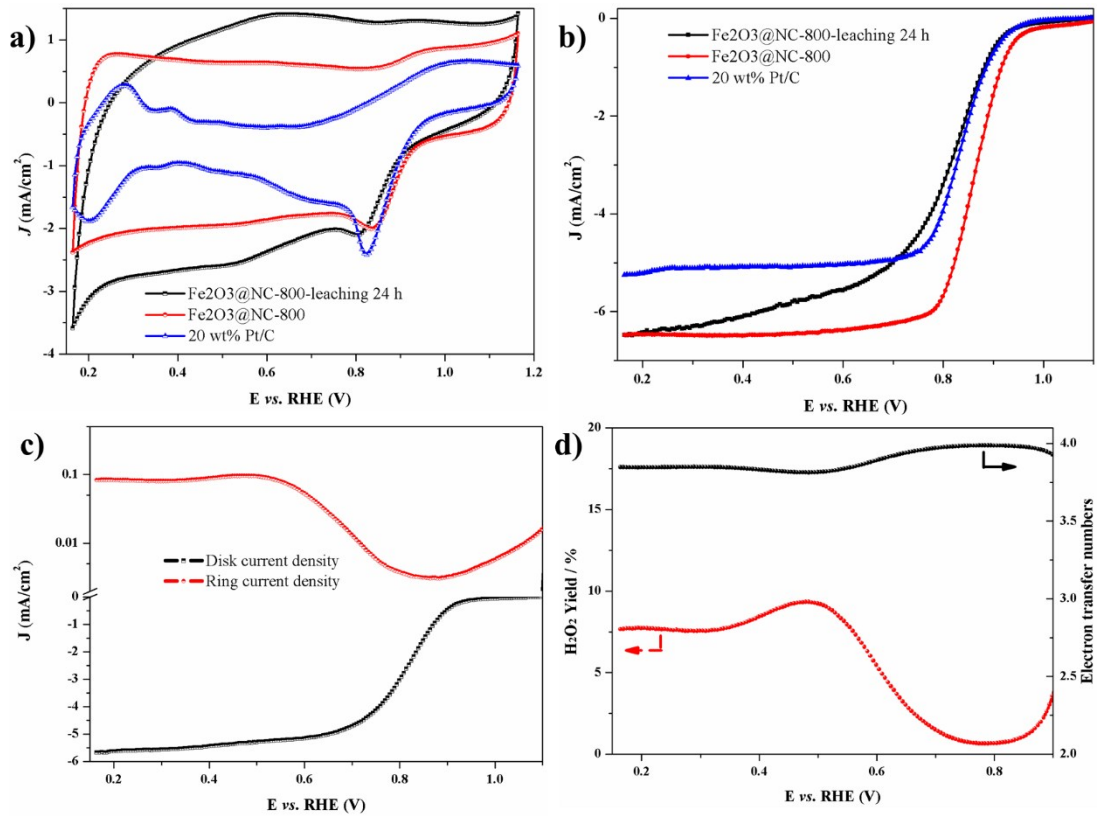

**Fig. S13** (a) Cyclic voltammograms of Fe<sub>2</sub>O<sub>3</sub>@NC-800 leaching for 24 h vs. RHE in 0.1 M KOH (O<sub>2</sub>-saturated), (b) Linear sweep voltammograms recorded in O<sub>2</sub>-saturated 0.1 M KOH at a scan rate of 10 mV s<sup>-1</sup> and rotation speed of 1600 rpm, (c) RRED of ring current and RRED of disk current, (d) H<sub>2</sub>O<sub>2</sub> yield and Electron transfer numbers (the disk was set to scan at 5 mV s<sup>-1</sup> from 1.2 V to 0.16 V and the ring was set at 0.3 V)

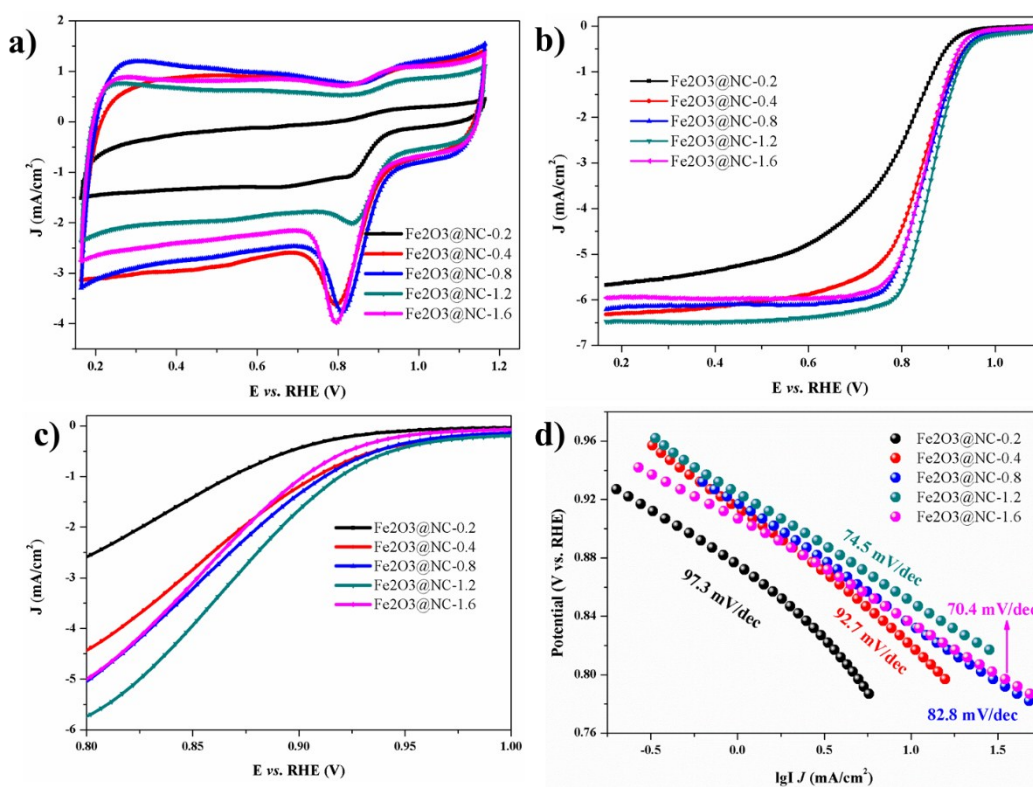

**Fig. S14** Cyclic voltammograms of as-prepared samples and 20 wt% Pt/C vs. RHE in 0.1 M KOH (O<sub>2</sub>-saturated), (b) Linear sweep voltammograms recorded in O<sub>2</sub>-saturated 0.1 M KOH at a scan rate of 10 mV s<sup>-1</sup> and rotation speed of 1600 rpm, (c) Enlargement of LSV at the voltage of 0.764 V to 1.0 V, (d) ORR Tafel slope.

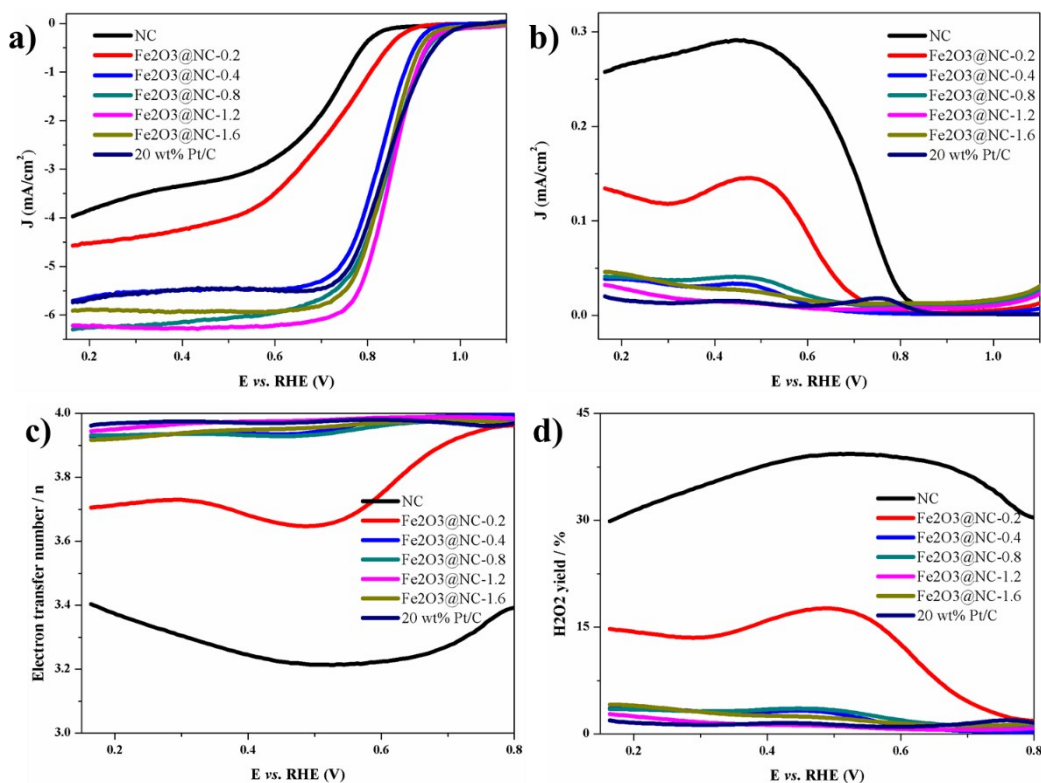

**Fig. S15** (a) RRED of ring current, (b) RRED of disk current, (c) H<sub>2</sub>O<sub>2</sub> yield, (d) electron transfer numbers (the disk was set to scan at 5 mV s<sup>-1</sup> from 0.15 V to 1.1 V and the ring was set at 0.3 V) of the as-prepared catalysts

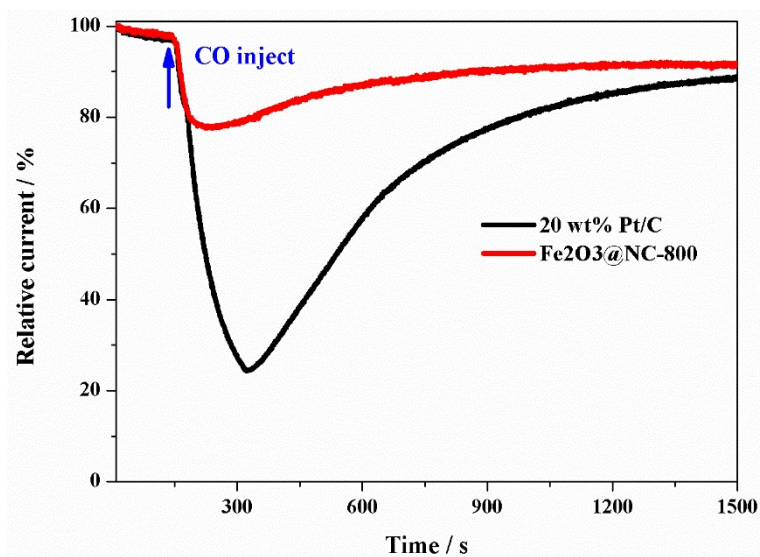

**Fig. S16** The abilities of tolerance against CO for different catalysts.

## References

- [1] M. Sun, Y. Dong, G. Zhang, J. Qu, J. Li,  $\alpha$ -Fe<sub>2</sub>O<sub>3</sub> spherical nanocrystals supported on CNTs as



efficient non-noble electrocatalysts for the oxygen reduction reaction, *Journal of Materials Chemistry A*, 2 (2014) 13635-13640.

[2] J. He, B. Li, J. Mao, Y. Liang, X. Yang, Z. Cui, S. Zhu, Z. Li, Four-electron oxygen reduction from mesoporous carbon modified with Fe<sub>2</sub>O<sub>3</sub> nanocrystals, *Journal of Materials Science*, 52 (2017) 10938-10947.

[3] L. Hadidi, E. Davari, D.G. Ivey, J.G. Veinot, Microwave-assisted synthesis and prototype oxygen reduction electrocatalyst application of N-doped carbon-coated Fe<sub>3</sub>O<sub>4</sub> nanorods, *Nanotechnology*, 28 (2017) 095707.

[4] V.M. Dhavale, S.K. Singh, A. Nadeema, S.S. Gaikwad, S. Kurungot, Nanocrystalline Fe-Fe<sub>2</sub>O<sub>3</sub> particle-deposited N-doped graphene as an activity-modulated Pt-free electrocatalyst for oxygen reduction reaction, *Nanoscale*, 7 (2015) 20117-20125.

[5] H. Wang, X. Cheng, F. Yin, B. Chen, T. Fan, X. He, Metal-organic gel-derived Fe-Fe<sub>2</sub>O<sub>3</sub>@nitrogen-doped-carbon nanoparticles anchored on nitrogen-doped carbon nanotubes as a highly effective catalyst for oxygen reduction reaction, *Electrochimica Acta*, 232 (2017) 114-122.

[6] Y. Gao, L. Wang, G. Li, Z. Xiao, Q. Wang, X. Zhang, Taming transition metals on N-doped CNTs by a one-pot method for efficient oxygen reduction reaction, *International Journal of Hydrogen Energy*, 43 (2018) 7893-7902.

[7] B. Li, Y. Chen, X. Ge, J. Chai, X. Zhang, T.S.A. Hor, G. Du, Z. Liu, H. Zhang, Y. Zong, Mussel-inspired one-pot synthesis of transition metal and nitrogen co-doped carbon (M/N-C) as efficient oxygen catalysts for Zn-air batteries, *Nanoscale*, 8 (2016) 5067-5075.

[8] H. Fan, K. Mao, M. Liu, O. Zhuo, J. Zhao, T. Sun, Y. Jiang, X. Du, X. Zhang, Q. Wu, R. Che, L. Yang, Q. Wu, X. Wang, Z. Hu, Tailoring the nano heterointerface of hematite/magnetite on hierarchical nitrogen-doped carbon nanocages for superb oxygen reduction, *Journal of Materials Chemistry A*, 6 (2018) 21313-21319.

[9] L. Zhuang, S. Fei, G. Lin, G. Chen, T. Shang, L. Jing, Z. Le, X. Li, B.W. Hao, Y. Lu, Post Iron Decoration of Mesoporous Nitrogen-Doped Carbon Spheres for Efficient Electrochemical Oxygen Reduction, *Advanced Energy Materials*, 7 (2017) 1701154.

[10] M. Hoque, S. Zhang, M.L. Thomas, Z. Li, S. Suzuki, A. Ando, M. Yanagi, Y. Kobayashi, K. Dokko, M. Watanabe, Simple combination of a protic salt and an iron halide: precursor for a Fe, N and S co-doped catalyst for the oxygen reduction reaction in alkaline and acidic media, *Journal of*

Materials Chemistry A, 6 (2018) 1138-1149.

[11] X. Liu, S. Zou, S. Chen, Ordered mesoporous carbons codoped with nitrogen and iron as effective catalysts for oxygen reduction reaction, *Nanoscale*, 8 (2016) 19249-19255.

[12] Y. Liu, H. Wang, D. Lin, J. Zhao, C. Liu, J. Xie, Y. Cui, A Prussian blue route to nitrogen-doped graphene aerogels as efficient electrocatalysts for oxygen reduction with enhanced active site accessibility, *Nano Research*, 10 (2016) 1213-1222.

[13] R. Ma, Y. Zhou, C. Hu, M. Yang, F. Wang, K. Yan, Q. Liu, J. Wang, Post iron-doping of activated nitrogen-doped carbon spheres as a high-activity oxygen reduction electrocatalyst, *Energy Storage Materials*, 13 (2018) 142-150.

[14] Y. Qian, T. An, K.E. Birgersson, Z. Liu, D. Zhao, Web-Like Interconnected Carbon Networks from NaCl-Assisted Pyrolysis of ZIF-8 for Highly Efficient Oxygen Reduction Catalysis, *Small*, 14 (2018) 1704169.

[15] H. Shen, E. Gracia-Espino, J. Ma, H. Tang, X. Mamat, T. Wagberg, G. Hu, S. Guo, Atomically FeN<sub>2</sub> moieties dispersed on mesoporous carbon: A new atomic catalyst for efficient oxygen reduction catalysis, *Nano Energy*, 35 (2017) 9-16.

[16] Y. Su, H. Jiang, Y. Zhu, X. Yang, J. Shen, W. Zou, J. Chen, C. Li, Enriched graphitic N-doped carbon-supported Fe<sub>3</sub>O<sub>4</sub> nanoparticles as efficient electrocatalysts for oxygen reduction reaction, *J. Mater. Chem. A*, 2 (2014) 7281-7287.

[17] H. Wang, W. Wang, M. Gui, M. Asif, Z. Wang, Y. Yu, J. Xiao, H. Liu, Uniform Fe<sub>3</sub>O<sub>4</sub>/Nitrogen-Doped Mesoporous Carbon Spheres Derived from Ferric Citrate-Bonded Melamine Resin as an Efficient Synergistic Catalyst for Oxygen Reduction, *ACS applied materials & interfaces*, 9 (2017) 335-344.

[18] W. Jing, L. Yan, Z. Xinyi, G.P. Simon, Z. Dongyuan, Z. Jin, J. Sanping, W. Huanting, Controllable synthesis of mesoporous carbon nanospheres and Fe-N/carbon nanospheres as efficient oxygen reduction electrocatalysts, *Nanoscale*, 7 (2015) 6247-6254.
